1  
2  
3  
4  
5  
6  
7  
8  
9  
10  
11  
12  
13  
14  
15  
16  
17  
18  
19  
20  
21  
22  
23  
24  
25  
26  
27  
28

## Optimization of 3D bioprinting of human neuroblastoma cells using sodium alginate hydrogel

Jakub Lewicki<sup>a\*</sup>, Joost Bergman<sup>a</sup>, Caoimhe Kerins<sup>a</sup>, Ola Hermanson<sup>a</sup>

<sup>a</sup> Department of Neuroscience, Karolinska Institutet,  
Biomedicum, SE17177 Stockholm, Sweden.

\* Correspondence to:  
Department of Neuroscience, Karolinska Institutet,  
Biomedicum, SE17177 Stockholm, Sweden.

E-mail address: [jakub.lewicki@ki.se](mailto:jakub.lewicki@ki.se) (J. Lewicki).

Keywords: Bioprinting, Neuroblastoma, Optimization, Alginate, FRESH, POI

*Abbreviations:* FRESH, freeform reversible embedding of suspended hydrogels; POI,  
parameter optimization index; SA, sodium alginate;

## 29 Abstract

30 There are many parameters in extrusion-based three-dimensional (3D) bioprinting of  
31 different materials that require fine-tuning to obtain the optimal print resolution and cell  
32 viability. To standardize this process, methods such as parameter optimization index (POI)  
33 have been introduced. The POI aims at pinpointing the optimal printing speed and pressure  
34 to achieve the highest accuracy keeping theoretical shear stress low. Here we applied the  
35 POI to optimize the process of 3D bioprinting human neuroblastoma cell-laden 2% sodium  
36 alginate (SA) hydrogel using freeform reversible embedding of suspended hydrogels (FRESH).  
37 Our results demonstrate a notable difference between optimal parameters for printing 2%  
38 SA with and without cells in the hydrogel. We also detected a significant influence of long-  
39 term cell culture on the printed constructs. This observation suggests that the POI has to be  
40 evaluated in the perspective of the final application. When taking these conditions into  
41 consideration, we could define a set of parameters that resulted in good quality prints  
42 maintaining high neuroblastoma cell viability (83% viable cells) during 7 days of cell culture  
43 using 2% SA and FRESH bioprinting. These results can be further used to manufacture  
44 neuroblastoma *in vitro* 3D culture systems to be used for cancer research.

45

## 46 2. Introduction

47

48 Stem cell and tumor biology allow for the generation of small organ-like or tumor-like  
49 structures to be developed *in vitro*, and this holds great promise for significant improvement  
50 of approaches in drug discovery and precision medicine. Bioprinting has emerged as an  
51 important tool for improving the conditions and control of such cell culture rationale [1,2].  
52 However, to achieve optimal results, many parameters of the microenvironment must be  
53 taken into account. We and others have demonstrated the significance of, e.g., oxygen levels  
54 [3,4], substrate stiffness [5,6], substrate roughness [7], and biomaterial properties [8] for  
55 progenitor cells to respond properly to external signaling factors such as growth factors, and  
56 to execute the appropriate transcriptional programs. Yet, 2-dimensional cell culture is in  
57 itself a limiting factor both in stem cell and tumor biology and it has been shown that, for  
58 example, certain tumor cells grown in 2D conditions are more sensitive to chemotherapeutic  
59 reagents than when grown in three dimensions [9], which may explain some of the lack of  
60 progress in cancer research heavily debated during recent years [10,11].

61

62 Three-dimensional (3D) bioprinting was first reported to deposit viable cells by Smith et al in  
63 2004 [12]. More than a decade later, 3D bioprinting is constantly being improved in terms of  
64 hardware, software, biomaterials, and applications. Standard 3D extrusion-based  
65 bioprinters, despite being relatively simple systems, can be challenging to use for cell  
66 deposition with high accuracy and viability. Only in recent years, more standardized  
67 materials and kits for different applications in bioprinting have become commercially  
68 available. Nevertheless, the technology in research settings is still far from a plug-and-play  
69 state, mostly due to a high number of variables involved in the 3D bioprinting process.

70

71 Some of the key factors are different biomaterials, their concentration and modifications,  
72 specific cell types used, cell concentration, deposition process and parameters (for example  
73 speed and pressure), crosslinking techniques and parameters, post-processing and cell  
74 culture conditions. Before the full potential of the technique can be realized, optimization of  
75 these parameters should be performed.

76

77 There are several examples of more systematic approaches to the bioprinting optimization  
78 process which can serve as a useful entry point for the specific application. However, some  
79 of these methods focus mostly or only on printability of the material, not taking the possible  
80 biological applications into account [13–15]. Moreover, 3D bioprinting should be viewed  
81 through the prism of an additional dimension, namely time. Such constructs may change  
82 over time in cell culture conditions due to purely physical interaction and/or dynamics of  
83 living cells embedded inside [16,17].

84

85 Bioprinting is very often applied for regenerative medicine and tissue engineering research,  
86 however, another important field for this technology is cancer and disease modeling aiming  
87 at providing new tools for drug discovery and personalized medicine. Here, we apply a  
88 freeform reversible embedding of suspended hydrogels (FRESH) 3D bioprinting method [18]  
89 using sodium alginate (SA) for creating constructs populated with human neuroblastoma  
90 cells SK-N-BE(2). Neuroblastoma is the most common extracranial childhood tumor that  
91 originates from precursor cells in the sympathetic nervous system [19]. There is a number of  
92 reports showing that many important physiological aspects of cancer cell culture (including  
93 neuroblastoma), such as gene and protein expression, migration and proliferation, are  
94 different in 2D cell cultures compared to 3D models [20,21]. Through the creation of more  
95 complex and physiologically relevant 3D cancer models, we may gain additional insights into  
96 tumorigenesis, progression and treatment.

97

98 Given the importance of extracellular matrix (ECM) properties for cell culture and previous  
99 observations that stiffer ECM may lead to a reduction of expression of essential transcription  
100 factors, such as N-Myc, and also differentiation of neuroblastoma cells [22], we decided to  
101 choose SA as a soft hydrogel for cell encapsulation. Moreover, SA has favorable biological  
102 and chemical properties, such as low toxicity, nonimmunogenicity, low cost, simple gelation  
103 mechanism, and compatibility with 3D bioprinting [18,23,24]. Choosing low concentration SA  
104 as a building material presents a challenge for bioprinting process due to its low viscosity.  
105 However, a technique such as FRESH could potentially overcome this obstacle. FRESH uses a  
106 gelatin slurry for physical support during the printing process and calcium coordination of  
107 alginate monomers. To further achieve the highest printing resolution and maximize cell  
108 viability, we combined the FRESH approach with an application of the printing optimization



109 index (POI) method [14]. The aim of the POI is to find a set of printing parameters, including  
110 a nozzle size, printing speed and pressure, that will result in high accuracy of the printed  
111 construct, maintaining low theoretical shear stress (TSS) at the same time. The POI method  
112 was originally used with SA and gelatin blends, however, it has previously not been applied  
113 to quantitatively assess low concentration SA bioprintability in combination with FRESH  
114 technique.

## 115 3. Materials and methods

116

### 117 3.1. Cell culture

118 SK-N-BE(2) (ATCC, CRL-2271) cells were cultured at 37°C, 5% CO<sub>2</sub> in DMEM/F12 with  
119 GlutaMAX (Life Technologies), supplemented with 10% Fetal Bovine Serum (FBS, Sigma) and  
120 0.1 mg/ml penicillin/streptomycin (Life Technologies). Media was replaced every three to  
121 four days. Upon full confluency, cells were passaged 1:5 to uncoated Petri dishes by adding  
122 trypLE (Life Technologies) for 5 minutes to dissociate the cells before being resuspended in  
123 growth medium and plated.

124

### 125 3.2. Sodium alginate preparation

126 2% SA was prepared by dissolving 20mg/ml SA (Allevi) in SK-N-BE(2) growth media. For the  
127 POI assessment 4 mg/ml green fluorescent PLGA microspheres (Sigma) were added to  
128 visualize the printed hydrogel during analysis. For printing with cells, SK-N-BE(2) cells were  
129 resuspended at  $1 \cdot 10^7$ /ml of 2% SA.

130

### 131 3.3. Control cell encapsulation in 2% SA

132 SK-N-BE(2) cells were encapsulated in 2% SA at  $1 \cdot 10^7$ /ml. Encapsulated cells were deposited  
133 as 10 µm drops in triplicates using a manual pipette on the bottom of ½ area 96-well optical  
134 plate (Corning) and cross-linked using 100 mM CaCl<sub>2</sub> solution for 15 minutes at 37°C.  
135 Subsequently, cross-linker was replaced with fresh SK-N-BE(2) growth medium. After 30  
136 minutes of incubation at 37°C medium was replaced again to reduce the amount of  
137 unwashed cross-linker. Then, cells were cultured normally as described above. Live/dead  
138 assay (Life Technologies) was performed at 24 and 72h (n=3) and cells were imaged using  
139 Operetta CLS high-content screening system (PerkinElmer) using 10x magnification and  
140 filters for calcein and EthD detection. Images were then quantified using Harmony 4.5  
141 software (PerkinElmer) using cell detection features.

142

### 143 3.4. Gelatin slurry preparation for FRESH 3D bioprinting

144 Gelatin support gel was prepared using FRESH kit according to the supplier's manual (Allevi).  
145 Briefly, 40 mg/ml of gelatin and 0.16 mg/ml of CaCl<sub>2</sub> were dissolved in deionized water at

146 40°C. After overnight incubation at 4°C, glass container with gelatin was filled with cold 0.16  
147 mg/ml of CaCl<sub>2</sub> and cooled at -20°C until ice crystal formation was apparent. Subsequently,  
148 the mixture was blended using the supplied blender (Allevi) in 3 pulses of 30 seconds  
149 followed by 30 second breaks between to reduce introduced heat. The resulting blend was  
150 centrifuged in 50 ml falcon tubes at 4000 RPM for 2 minutes at 4°C and supernatant was  
151 discarded. Gelatin collected at the bottom was resuspended using cold 0.16 mg/ml CaCl<sub>2</sub> and  
152 centrifuged again using the same settings. This step was repeated several times until no  
153 white foam was observed on top of the supernatant. Directly before printing, the gelatin  
154 slurry was resuspended in cold CaCl<sub>2</sub> and spun down at 1100 RPM for 5 minutes and the  
155 supernatant was discarded. The remaining gelatin was used to fill wells in a 24-well plate.  
156 Water-absorbent tissue was laid on top of the wells to draw excess water from the support  
157 slurry.

158

### 159 **3.5. 3D Bioprinting using FRESH method**

160 For each 3D print FRESH method was applied as described previously [18] with some  
161 modifications. The Allevi 2 3D bioprinter (Allevi) was used for material deposition in support  
162 gelatin slurry using pneumatic extrusion. Each time, a 2.54 cm long 30G blunt needle (Allevi)  
163 was used in combination with a 10 ml syringe (BD Biosciences). After printing, 100 mM CaCl<sub>2</sub>  
164 was added to each well containing a scaffold and the plate was placed in the incubator at  
165 37°C and left there for 20 minutes until the gelatin completely dissolved. Afterward, the  
166 remaining liquid in each well was replaced with a fresh 100 mM CaCl<sub>2</sub> pre-warmed to 37°C  
167 for further cross-linking at 37°C for 15 minutes. Next, printed constructs were used in  
168 different assays described below. When cells were used in 3D bioprints, the cross-linker was  
169 replaced with fresh SK-N-BE(2) media. After 30 minutes of incubation at 37°C, medium was  
170 replaced again to reduce the amount of unwashed cross-linker.

171

### 172 **3.6. The POI determination**

173 2% SA mixed with 4mg/ml of green fluorescent PLGA microspheres (Sigma) was printed with  
174 or without 1·10<sup>7</sup>/ml SK-N-BE(2) cells using the FRESH method described above. One-layer  
175 spiral design was used as a blueprint for material deposition. The design was created using  
176 Fusion360 software (Autodesk) and processed using Repetier Host (Hot-World GmbH & Co.)

177 to create G-code files. Using Slic3r, the designs were sliced with a line height of 0.2 mm.  
 178 Printing parameters used for the POI determination are described in the Table 1.

179

180 **Table 1. Printing parameters used for the POI determination.**

181

|                 |                            | Number of replicates without cells / with cells |          |         |           |
|-----------------|----------------------------|-------------------------------------------------|----------|---------|-----------|
|                 |                            | 5 / 34                                          | 7.5 / 52 | 10 / 69 | 12.5 / 86 |
| Speed<br>(mm/s) | Pressure<br>(psi /<br>kPa) |                                                 |          |         |           |
|                 | 2                          | 3 / 3                                           | 5 / 4    | 5 / 3   | 6 / 3     |
|                 | 4                          | 4 / N/A                                         | 6 / 4    | 6 / 4   | 4 / 4     |
|                 | 6                          | 4 / N/A                                         | 5 / 3    | 6 / 3   | 6 / 4     |
|                 | 8                          | 3 / N/A                                         | 6 / 3    | 6 / 4   | 6 / 4     |

182

183 Directly after crosslinking, constructs were imaged in the 24-well plate using an Observer Z1  
 184 inverted fluorescent microscope (Zeiss). Images were analyzed using ImageJ [25] software  
 185 and custom-written macro scripts calculating the average width of imaged lines.

186

187 Briefly, the first script changed the analyzed image into binary and then proceeded to the  
 188 region of interest (ROI) demarcation by a series of dilation and erosion steps resulting in  
 189 noise reduction. Next, the line was aligned manually, resulting in a solid vertical line. The  
 190 second script created selection of a one-pixel high box spanning the whole horizontal axis of  
 191 the image. Within this box, the average width of the line was measured by determining the  
 192 outmost black pixels and calculating the distance between them. This procedure was run in a  
 193 loop to analyze the entire length of the imaged line resulting in average line width.

194

195 The POI was calculated using equations (1) and (2) as described before [14].

196

197 
$$(1) POI = \frac{1}{t_{line} \cdot D_G \cdot p}$$

198

199 
$$(2) POI_i = \frac{POI_i}{POI_{MAX,n}}$$

200

201 Where  $D_G$  = needle gauge,  $p$  = extrusion pressure,  $t_{line}$  = printed line width,  $POI_{MAX}$  = the  
202 highest POI score found,  $n$  = total amount of parameter combinations.  $POI_i$  score can assume  
203 values between 0 (the worst) to 1 (the best).

204

### 205 **3.7. 3D bioprinting SK-N-BE(2) cells for live/dead assay**

206 For assessing cell viability, SK-N-BE(2) cells were printed at  $1 \cdot 10^7$ /ml concentration using 7.5  
207 (n=3); 10 (n=3); 12.5 psi (n=4) at 8mm/s. 4-layer lattice G-code file provided by Allevi was  
208 used as a blueprint for material extrusion. Scaffolds were cross-linked as described above  
209 and cultured for up to 7 days with live/dead assay performed at 24h and 7 days.

210 Live/dead assay (Life Technologies) was performed according to manufacturer's instruction  
211 using 4  $\mu$ M EtD and 2  $\mu$ M calcein. However, DMEM/F12 media was used as washing agent  
212 instead of PBS to avoid calcium precipitation and scaffold dissolution. Dead controls were  
213 obtained by treating scaffolds with 70% ethanol for 30 minutes at 37°C.

214 Cells were imaged using LSM 700 confocal microscope (Zeiss) and images were analyzed in  
215 3D using Imaris 9.2 software (Bitplane) using spot detection and surface creation based on  
216 the fluorescent signal for later volume calculations.

217

### 218 **3.8. Statistical analysis**

219 Statistical analysis was performed using Prism 8 (GraphPad). For line width measurements,  
220 two-way ANOVA and Tukey's multiple comparison test were used. For SK-N-BE(2) cells  
221 viability after printing, two-way ANOVA with Sidak's multiple test were performed. Object  
222 volumes were compared using one-way ANOVA with Tukey's multiple comparison test.

223 Results were considered significant at  $p \leq 0.05$ . For correlation between pressure and  
224 viability of cells at 24h, Pearson correlation was calculated.

## 225 4. Results

226

### 227 4.1. SK-N-BE(2) cells encapsulation in 2% SA

228 There have been several reports of using alginates for neuroblastoma cell growth, however,  
229 either focusing on mouse cell lines and/or peptide-modified alginates [26–28]. Therefore  
230 before proceeding with bioprinting, simple SK-N-BE(2) cell encapsulation in 2% SA gel  
231 followed by viability assay was performed to assess biocompatibility with the human  
232 neuroblastoma cell line. After 24 hours post-encapsulation SK-N-BE(2) cells displayed 56% of  
233 viability and which remained stable at the later time point at 72 hours (Fig. 1). Cells  
234 appeared round in morphology, homogeneously filling the entire volume of casted SA gel in a  
235 well plate. After 72 hours in culture, cells covered more volume of the gel and started to  
236 form larger colonies (Fig. 1a). This positive initial result, proved SA to support human  
237 neuroblastoma cell viability and growth upon encapsulation, making it a possible candidate  
238 for bioprinting application.

239

### 240 4.2. Parameter optimization index

241 First, 2% SA alone was used for the POI determination ( $POI_{2\% SA}$ ). Simple single-layer spiral  
242 design was used as a template for material extrusion. Four different speeds and four  
243 different extrusion pressures were used to deposit SA in a support gelatin bath (Table 1.).

244

245 Accurate width measurement of a printed strand is central for the POI determination, thus  
246 we developed an ImageJ macro to evaluate this parameter in semi-automated and non-  
247 biased approach. This script allowed us to measure extrusion width along the entire line,  
248 pixel-by-pixel, resulting in an accurate average strand dimension that was later used for POI.

249

250 As shown in Figure 2, the image of a printed SA line after crosslinking acquired with a  
251 fluorescent microscope is later converted to a binary image which is used to create a region  
252 of interest (ROI). Proper alignment of an automatically generated ROI with both brightfield  
253 and fluorescent microscopic image (Fig. 2e) proved this method to be a fast and efficient  
254 way to analyze SA prints.

255

256 Analysis of printed lines (Fig. 3a) using only 2% SA showed that pressure is the most  
257 important factor influencing strand width. 72.8% of variability between different groups  
258 could be accounted to pressure, whereas speed was responsible for only 2.3% of the total  
259 variation between groups. The thinnest lines were achieved while printing with 5 psi (291 to  
260 302  $\mu\text{m}$  of average width depending on speed), whereas the thickest were a result of using  
261 the highest tested pressure: 12.5 psi (557-584  $\mu\text{m}$  of average width depending on speed).

262

263 Subsequently, these values were used to calculate  $\text{POI}_{2\% \text{ SA}}$ . Maximum normalized  $\text{POI}_{2\% \text{ SA}}$   
264 value of 1 was a result of using combination of the lowest pressure (5 psi) and highest speed  
265 (8 mm/s) providing parameters with the best print accuracy and the lowest TSS for printing  
266 cells (Fig 3b). However, when we used this set of parameters to print 2% SA mixed together  
267 with SK-N-BE(2) cells, we observed very poor mechanical properties of the final constructs,  
268 resulting in a quick structural disintegration during handling. Thus, we decided to repeat  
269 printed line width measurements, this time using 2% SA and SK-N-BE(2) cells combined  
270 together.

271

272 Indeed, during our analysis we were unable to obtain enough intact samples for strand  
273 dimensions analysis while using 5 psi at 4, 6 and 8 mm/s printing speed. Additionally, the  
274 width of the printed lines using 2% SA with SK-N-BE(2) cells was significantly different from  
275 lines printed with 2% SA alone when using the lowest speed at every tested pressure  
276 (Supplementary Figure 1.). Within constructs populated with cells, not only pressure was a  
277 significant factor accounting for 18.0% of total variance, but also speed (50.3% of total  
278 variance).

279

280 A new POI was calculated using measurements from printing 2% SA with SK-N-BE(2) cells  
281 ( $\text{POI}_{2\% \text{ SA}+\text{SKN}}$ ). Maximum  $\text{POI}_{2\% \text{ SA}+\text{SKN}}$  was obtained for 7.5 psi and 8mm/s printing speed (Fig  
282 3c). Altogether, these results revealed the impact of the presence of cells in the tested  
283 material and its influence on the POI determination. Hence the parameters calculated for 3D  
284 printing of pure biomaterial samples might not be suitable for the same biomaterial when  
285 mixed with cells.

286

287 **4.3. FRESH bioprinting of SK-N-BE(2) cells**

288 Next, we used 2% SA mixed with SK-N-BE(2) cells to FRESH bioprint a four-layer lattice (Fig.  
289 4). 7.5, 10, and 12.5 psi pressures were used at 8 mm/s. 5 psi pressure was not used due to  
290 poor mechanical properties of the prints. The highest speed from the previous tests was  
291 applied, as this resulted in the highest POI scores in each pressure condition (Fig. 3c). Such  
292 constructs were cultured for up to one week and viability assay was performed at 24h and 7  
293 days.

294

295 24 hours post-printing cells were homogenously distributed in the entire print volume. At  
296 this time point cells displayed relatively low viability. There was a significant difference in cell  
297 survival while using different pressures with a strong positive correlation between the  
298 pressure applied and the percentage of live cells ( $R^2 = 0.99$ ). At 24h post-printing only 19%  
299 of cells were viable at 7.5 psi, however, it was more than doubled at 10 psi (40% of live cells)  
300 and 52.5% viability for the highest pressure (Fig. 5a, b).

301

302 The post-printing cell viability after 7 days was notably higher with 62% at 10 psi and  
303 reaching significant difference at 83.7% viability at 12.5 psi ( $p = 0.03$ ). Constructs printed  
304 with 7.5 psi were more fragile than others, and did not withstand the staining process for  
305 viability assays (data not shown). Cells over time started to form more compact colonies and  
306 clustered together. Volume analysis of such clusters, showed significantly higher mean  
307 volume of clusters at 7 days compared to 24h:  $1.3 \cdot 10^5 \mu\text{m}^3$  for 10 psi and  $1.4 \cdot 10^5 \mu\text{m}^3$  for  
308 12.5 psi at 7d;  $2.3 \cdot 10^4 \mu\text{m}^3$  and  $2.8 \cdot 10^4 \mu\text{m}^3$  for 10 and 12.5 psi at 24h respectively.

309

310 Together, our results show that despite low initial viability, SK-N-BE(2) cells are able to  
311 recover and display significantly higher viability at later time points. We further suggest  
312 using a POI value corrected for long time cell culture effect on the construct. Maximum  
313  $\text{POI}_{2\%SA+SKN}$  did not result in the robust constructs after culturing for 7 days. However,  
314 printing with parameters for the next highest  $\text{POI}_{2\%SA+SKN}$  values (10 and 12.5 psi at 8mm/s)  
315 gave rise to scaffolds that survived culturing and post-processing, maintaining high cell  
316 viability.



## 317 5. Discussion

318

319 The material chosen here, sodium alginate, is widely used for cells encapsulation both *in*  
320 *vitro* [29–31] and *in vivo* [32,33]. Even though unmodified alginate-based hydrogel does not  
321 support interaction with cells directly [34] it is possible to use them as a scaffold for cell  
322 immobilization that can lead to aggregation [35]. However, if needed, alginate can be  
323 modified with specific cell attachment proteins or blended with different biomaterials such  
324 as silk fibroin to improve cell adhesion [36,37]. Lack of cell adhesion sites in polysaccharide  
325 chains of sodium alginate may explain to some extent initial lower viability of SKN cells  
326 encapsulated in it [38]. Further, reduction of cell viability upon bioprinting can be a  
327 combination of shear stress on extruded cells and cross-linking conditions that are slightly  
328 different in the FRESH printed samples comparing to simply casted hydrogel [18,39]. During  
329 the FRESH bioprinting, cells need to pass through a long and thin canal of a needle (2.54 cm  
330 long and 0.159 mm inner diameter), whereas in our encapsulation control, cells mixed with  
331 2% SA were dispensed using standard pipette tip with an inner nozzle diameter of around  
332 1.5 mm. This radically different geometry will result in higher shear stress upon bioprinting.  
333 Additionally, exposure to  $\text{CaCl}_2$  as a cross-linker can reduce cell viability by generating  
334 osmotic stress and/or apoptosis induction through calcium signaling [40,41]. During FRESH  
335 bioprinting, cells are exposed to calcium ions for a longer time than in encapsulation due to  
336 time need for printing and gelatin support dissolving, which can further explain differences  
337 in cell viability between these two conditions.

338

339 Another aspect is a difference in cell survival dependent on the pressure applied for  
340 extrusion. There are studies on this relationship showing that increased pressure results in  
341 decreased cell viability due to mechanical stress introduced [39,42]. However, here we show  
342 a reverse relationship. Cells displayed the highest viability in the highest pressure applied  
343 (12.5 psi) at 24h and 7 days post-printing. This contradictory results could be accounted for  
344 the fact that pressures that we studied were generally on the lower end of the scale (from 5  
345 to 12.5 psi), whereas other reports mentioned above describe differences in cell viability  
346 only for bigger changes in pressure (i.e. 5 vs 20 psi). Significant differences in cell survival  
347 presented here are probably result of a different mechanism that comes into play and is

348 stronger than mechanical stress due to cell extrusion. This, for example, could be an effect of  
349 geometry (thinner lines extruded with lower pressure) or result of different overall cell  
350 number deposited at a single construct, but more studies would be required to explain the  
351 exact mechanism. Nevertheless, 7 days after bioprinting, SK-N-BE(2) cells displayed much  
352 higher viability. This could be due to washing away dead cells from the construct, cell  
353 recovery from mechanical damage, and/or increased proliferation. Large cell clusters  
354 observed at this time point could support the cell proliferation effect also observed for  
355 MC3T3-E1 cells in alginate [43].

356

357 The success of particular bioprinting application relies on the optimization of all the  
358 components in the given system. There are reports on optimization of specific aspects of  
359 bioprinting, from biocompatibility of materials used [44], to extrusion process [13], however  
360 combination of different aspects or long term effects are sometimes overlooked. The POI  
361 may serve as a valuable tool for maximizing print resolution with control of TSS, but it is  
362 important to note, that these calculations should be made not on the biomaterial alone, but  
363 in combination with target cell type at the desired concentration. The presence of cells can  
364 alter the rheological properties of the hydrogel changing parameters required for proper  
365 extrusion [45]. Furthermore, it can also have a long-term effect on the structure itself.  
366 Proliferation, migration, and scaffold remodeling can affect mechanical properties, shape,  
367 and integrity of the construct [17]. Also, the cell culture conditions, for example, the  
368 presence of ions such as Na<sup>+</sup> or Mg<sup>2+</sup> may lead to calcium release from the alginate gel and  
369 its eventual dissolution [46]. Thus, in summary, to create reproducible and useful bioprinted  
370 *in vitro* models, it is important to take all these factors into account.

## 371 6. Conclusion

372 We applied the POI method to find the best settings for printing SK-N-BE(2) cells embedded  
373 in a 2% SA hydrogel. We showed the importance of using the POI analysis on the final  
374 composition of the biomaterial printed, including the right concentration of cells, as it  
375 significantly affected the outcome. Printing neuroblastoma cells with parameters for the  
376 highest  $POI_{2\% SA+SKN}$  (7.5 psi and 8 mm/s) despite being a reflection of the best printing  
377 accuracy and the lowest TSS, resulted in fragile constructs that did not stand staining  
378 process. However, applying speed and pressure from the next highest  $POI_{2\% SA+SKN}$  values (10  
379 and 12.5 psi at 8mm/s) resulted in constructs with high cell viability after 7 days in cell  
380 culture. Therefore, we suggest using the POI as a tool for finding optimal parameters in the  
381 context of the final application. If the bioprinted construct is intended to be used at later  
382 time points, the POI should be viewed in the perspective of long-term cell culture and its  
383 effects on cell viability and scaffold integrity.

384

## 385 Acknowledgements

386

387 We thank members of the Hermanson lab for valuable input on the manuscript. This study  
388 was supported by project grants from the Swedish Research Council (VR-MH), the Swedish  
389 Cancer Society (Cancerfonden), and the Swedish Childhood Cancer Foundation  
390 (Barncancerfonden) to O.H.

391 **REFERENCES:**

392

- 393 [1] S. Ilkhanizadeh, A.I. Teixeira, O. Hermanson, Inkjet printing of macromolecules on  
394 hydrogels to steer neural stem cell differentiation., *Biomaterials*. 28 (2007) 3936–  
395 3943. doi:10.1016/j.biomaterials.2007.05.018.
- 396 [2] T. Xu, J. Jin, C. Gregory, J.J.J.J. Hickman, T. Boland, Inkjet printing of viable mammalian  
397 cells., *Biomaterials*. 26 (2005) 93–99. doi:10.1016/j.biomaterials.2004.04.011.
- 398 [3] J.M. Dias, S. Ilkhanizadeh, E. Karaca, J.K. Duckworth, V. Lundin, M.G. Rosenfeld, J.  
399 Ericson, O. Hermanson, A.I. Teixeira, CtBPs Sense Microenvironmental Oxygen Levels  
400 to Regulate Neural Stem Cell State, *Cell Rep*. 8 (2014) 665–670.  
401 doi:10.1016/J.CELREP.2014.06.057.
- 402 [4] E. Karaca, J. Lewicki, O. Hermanson, Oxygen-dependent acetylation and dimerization  
403 of the corepressor CtBP2 in neural stem cells, *Exp. Cell Res*. 332 (2015).  
404 doi:10.1016/j.yexcr.2014.10.013.
- 405 [5] A.J. Engler, S. Sen, H.L. Sweeney, D.E. Discher, Matrix elasticity directs stem cell  
406 lineage specification., *Cell*. 126 (2006) 677–89. doi:10.1016/j.cell.2006.06.044.
- 407 [6] A.I. Teixeira, S. Ilkhanizadeh, J.A. Wiggenius, J.K. Duckworth, O. Inganäs, O. Hermanson,  
408 The promotion of neuronal maturation on soft substrates, *Biomaterials*. 30 (2009)  
409 4567–4572. doi:10.1016/j.biomaterials.2009.05.013.
- 410 [7] N.R. Blumenthal, O. Hermanson, B. Heimrich, V.P. Shastri, Stochastic nanoroughness  
411 modulates neuron–astrocyte interactions and function via mechanosensing cation  
412 channels, *Proc. Natl. Acad. Sci*. 111 (2014) 16124–16129.  
413 doi:10.1073/pnas.1412740111.
- 414 [8] M. Lewicka, O. Hermanson, A.U. Rising, Recombinant spider silk matrices for neural  
415 stem cell cultures, *Biomaterials*. 33 (2012) 7712–7717.  
416 doi:10.1016/j.biomaterials.2012.07.021.
- 417 [9] P. Longati, X. Jia, J. Eimer, A. Wagman, M.R. Witt, S. Rehnmark, C. Verbeke, R.  
418 Toftgård, M. Löhr, R.L. Heuchel, 3D pancreatic carcinoma spheroids induce a matrix-  
419 rich, chemoresistant phenotype offering a better model for drug testing, *BMC Cancer*.  
420 13 (2013) 95. doi:10.1186/1471-2407-13-95.
- 421 [10] B. Weigelt, C.M. Ghajar, M.J. Bissell, The need for complex 3D culture models to  
422 unravel novel pathways and identify accurate biomarkers in breast cancer., *Adv. Drug*

- 423 Deliv. Rev. 69–70 (2014) 42–51. doi:10.1016/j.addr.2014.01.001.
- 424 [11] A. Riedl, M. Schleder, K. Pudelko, M. Stadler, S. Walter, D. Unterleuthner, C. Unger,  
425 N. Kramer, M. Hengstschläger, L. Kenner, D. Pfeiffer, G. Krupitza, H. Dolznig,  
426 Comparison of cancer cells in 2D vs 3D culture reveals differences in AKT-mTOR-S6K  
427 signaling and drug responses., *J. Cell Sci.* 130 (2017) 203–218. doi:10.1242/jcs.188102.
- 428 [12] C.M. Smith, A.L. Stone, R.L. Parkhill, R.L. Stewart, M.W. Simpkins, A.M. Kachurin, W.L.  
429 Warren, S.K. Williams, Three-dimensional bioassembly tool for generating viable  
430 tissue-engineered constructs., *Tissue Eng.* 10 (2004) 1566–76.  
431 doi:10.1089/ten.2004.10.1566.
- 432 [13] S. Abdollahi, A. Davis, J.H. Miller, A.W. Feinberg, Expert-guided optimization for 3D  
433 printing of soft and liquid materials, *PLoS One.* 13 (2018) e0194890.  
434 doi:10.1371/journal.pone.0194890.
- 435 [14] B. Webb, B.J. Doyle, Parameter optimization for 3D bioprinting of hydrogels,  
436 *Bioprinting.* 8 (2017) 8–12. doi:10.1016/J.BPRINT.2017.09.001.
- 437 [15] T. Gao, G.J. Gillispie, J.S. Copus, A.K. PR, Y.-J. Seol, A. Atala, J.J. Yoo, S.J. Lee,  
438 Optimization of gelatin–alginate composite bioink printability using rheological  
439 parameters: a systematic approach, *Biofabrication.* 10 (2018) 034106.  
440 doi:10.1088/1758-5090/aacdc7.
- 441 [16] A. Sydney Gladman, E.A. Matsumoto, R.G. Nuzzo, L. Mahadevan, J.A. Lewis,  
442 Biomimetic 4D printing, *Nat. Mater.* 15 (2016) 413–418. doi:10.1038/nmat4544.
- 443 [17] R.L. Mauck, C.C.-B. Wang, E.S. Oswald, G.A. Ateshian, C.T. Hung, The role of cell  
444 seeding density and nutrient supply for articular cartilage tissue engineering with  
445 deformational loading., *Osteoarthr. Cartil.* 11 (2003) 879–90.
- 446 [18] T.J. Hinton, Q. Jallerat, R.N. Palchesko, J.H. Park, M.S. Grodzicki, H.-J. Shue, M.H.  
447 Ramadan, A.R. Hudson, A.W. Feinberg, Three-dimensional printing of complex  
448 biological structures by freeform reversible embedding of suspended hydrogels, *Sci.*  
449 *Adv.* 1 (2015) e1500758–e1500758. doi:10.1126/sciadv.1500758.
- 450 [19] G.M. Brodeur, Neuroblastoma: biological insights into a clinical enigma, *Nat. Rev.*  
451 *Cancer.* 3 (2003) 203–216. doi:10.1038/nrc1014.
- 452 [20] C. Wang, Z. Tang, Y. Zhao, R. Yao, L. Li, W. Sun, Three-dimensional in vitro cancer  
453 models: a short review., *Biofabrication.* 6 (2014) 022001. doi:10.1088/1758-  
454 5082/6/2/022001.

- 455 [21] H.R. Kumar, X. Zhong, D.J. Hoelz, F.J. Rescorla, R.J. Hickey, L.H. Malkas, J.A. Sandoval,  
456 Three-dimensional neuroblastoma cell culture: proteomic analysis between  
457 monolayer and multicellular tumor spheroids., *Pediatr. Surg. Int.* 24 (2008) 1229–34.  
458 doi:10.1007/s00383-008-2245-2.
- 459 [22] W.A. Lam, L. Cao, V. Umesh, A.J. Keung, S. Sen, S. Kumar, Extracellular matrix rigidity  
460 modulates neuroblastoma cell differentiation and N-myc expression, *Mol. Cancer.* 9  
461 (2010) 35. doi:10.1186/1476-4598-9-35.
- 462 [23] W.R. Gombotz, S. Wee, Protein release from alginate matrices, *Adv. Drug Deliv. Rev.*  
463 31 (1998) 267–285. doi:10.1016/S0169-409X(97)00124-5.
- 464 [24] A.G. Tabriz, M.A. Hermida, N.R. Leslie, W. Shu, Three-dimensional bioprinting of  
465 complex cell laden alginate hydrogel structures, *Biofabrication.* 7 (2015) 045012.  
466 doi:10.1088/1758-5090/7/4/045012.
- 467 [25] C.A. Schneider, W.S. Rasband, K.W. Eliceiri, NIH Image to ImageJ: 25 years of image  
468 analysis, *Nat. Methods.* (2012). doi:10.1038/nmeth.2089.
- 469 [26] C. Tamponnet, S. Boisseau, P.-N. Lirsac, J.-N. Barbotin, C. Poujeol, M. Lievremont, M.  
470 Simonneau, Storage and growth of neuroblastoma cells immobilized in calcium-  
471 alginate beads, *Appl. Microbiol. Biotechnol.* 33 (1990) 442–447.  
472 doi:10.1007/BF00176662.
- 473 [27] N.O. Dhoot, C.A. Tobias, I. Fischer, M.A. Wheatley, Peptide-modified alginate surfaces  
474 as a growth permissive substrate for neurite outgrowth, *J. Biomed. Mater. Res.* 71A  
475 (2004) 191–200. doi:10.1002/jbm.a.30103.
- 476 [28] S. Kintzios, I. Yiakoumetis, G. Moschopoulou, O. Mangana, K. Nomikou, A. Simonian,  
477 Differential effect of the shape of calcium alginate matrices on the physiology of  
478 immobilized neuroblastoma N2a and Vero cells: A comparative study, *Biosens.*  
479 *Bioelectron.* 23 (2007) 543–548. doi:10.1016/J.BIOS.2007.07.003.
- 480 [29] G. Palazzolo, N. Broguiere, O. Cenciarelli, H. Dermutz, M. Zenobi-Wong, Ultrasoft  
481 Alginate Hydrogels Support Long-Term Three-Dimensional Functional Neuronal  
482 Networks, *Tissue Eng. Part A.* 21 (2015) 2177–2185. doi:10.1089/ten.tea.2014.0518.
- 483 [30] S. Degala, W.R. Zipfel, L.J. Bonassar, Chondrocyte calcium signaling in response to fluid  
484 flow is regulated by matrix adhesion in 3-D alginate scaffolds, *Arch. Biochem. Biophys.*  
485 505 (2011) 112–117. doi:10.1016/j.abb.2010.08.003.
- 486 [31] O. Jeon, C. Powell, S.M. Ahmed, E. Alsberg, Biodegradable, Photocrosslinked Alginate

- 487 Hydrogels with Independently Tailorable Physical Properties and Cell Adhesivity,  
488 Tissue Eng. Part A. 16 (2010) 2915–2925. doi:10.1089/ten.tea.2010.0096.
- 489 [32] E. Alsberg, K.W. Anderson, A. Albeiruti, R.T. Franceschi, D.J. Mooney, Cell-interactive  
490 Alginate Hydrogels for Bone Tissue Engineering, J. Dent. Res. 80 (2001) 2025–2029.  
491 doi:10.1177/00220345010800111501.
- 492 [33] E. Hill, T. Boontheekul, D.J. Mooney, Designing Scaffolds to Enhance Transplanted  
493 Myoblast Survival and Migration, Tissue Eng. 12 (2006) 1295–1304.  
494 doi:10.1089/ten.2006.12.1295.
- 495 [34] J.A. Rowley, G. Madlambayan, D.J. Mooney, Alginate hydrogels as synthetic  
496 extracellular matrix materials, Biomaterials. 20 (1999) 45–53. doi:10.1016/S0142-  
497 9612(98)00107-0.
- 498 [35] K. Yagi, K. Tsuda, M. Serada, C. Yamada, A. Kondoh, Y. Miura, Rapid Formation of  
499 Multicellular Spheroids of Adult Rat Hepatocytes by Rotation Culture and Their  
500 Immobilization within Calcium Alginate, Artif. Organs. 17 (2008) 929–934.  
501 doi:10.1111/j.1525-1594.1993.tb00405.x.
- 502 [36] J.T. Connelly, A.J. García, M.E. Levenston, Inhibition of in vitro chondrogenesis in RGD-  
503 modified three-dimensional alginate gels, Biomaterials. 28 (2007) 1071–1083.  
504 doi:10.1016/J.BIOMATERIALS.2006.10.006.
- 505 [37] Y. Wang, X. Wang, J. Shi, R. Zhu, J. Zhang, Z. Zhang, D. Ma, Y. Hou, F. Lin, J. Yang, M.  
506 Mizuno, A Biomimetic Silk Fibroin/Sodium Alginate Composite Scaffold for Soft Tissue  
507 Engineering, Sci. Rep. 6 (2016) 39477. doi:10.1038/srep39477.
- 508 [38] D.E. Ingber, J. Folkman, Mechanochemical switching between growth and  
509 differentiation during fibroblast growth factor-stimulated angiogenesis in vitro: role of  
510 extracellular matrix., J. Cell Biol. 109 (1989) 317–30.
- 511 [39] R. Chang, J. Nam, W. Sun, Effects of dispensing pressure and nozzle diameter on cell  
512 survival from solid freeform fabrication-based direct cell writing., Tissue Eng. Part A.  
513 14 (2008) 41–8. doi:10.1089/ten.a.2007.0004.
- 514 [40] L. Scorrano, S.A. Oakes, J.T. Opferman, E.H. Cheng, M.D. Sorcinelli, T. Pozzan, S.J.  
515 Korsmeyer, BAX and BAK Regulation of Endoplasmic Reticulum Ca<sup>2+</sup>: A Control Point  
516 for Apoptosis, Science (80-. ). 300 (2003) 135–139. doi:10.1126/science.1081208.
- 517 [41] N. Cao, X.B. Chen, D.J. Schreyer, Influence of Calcium Ions on Cell Survival and  
518 Proliferation in the Context of an Alginate Hydrogel, ISRN Chem. Eng. 2012 (2012) 1–

- 519 9. doi:10.5402/2012/516461.
- 520 [42] K. Nair, M. Gandhi, S. Khalil, K.C. Yan, M. Marcolongo, K. Barbee, W. Sun,  
521 Characterization of cell viability during bioprinting processes, *Biotechnol. J.* 4 (2009)  
522 1168–1177. doi:10.1002/biot.200900004.
- 523 [43] B.-H. Lee, B. Li, S.A. Guelcher, Gel microstructure regulates proliferation and  
524 differentiation of MC3T3-E1 cells encapsulated in alginate beads, *Acta Biomater.* 8  
525 (2012) 1693–1702. doi:10.1016/J.ACTBIO.2012.01.012.
- 526 [44] J.P. Frampton, M.R. Hynd, M.L. Shuler, W. Shain, Fabrication and optimization of  
527 alginate hydrogel constructs for use in 3D neural cell culture, *Biomed. Mater.* 6 (2011)  
528 015002. doi:10.1088/1748-6041/6/1/015002.
- 529 [45] T. Billiet, E. Gevaert, T. De Schryver, M. Cornelissen, P. Dubruel, The 3D printing of  
530 gelatin methacrylamide cell-laden tissue-engineered constructs with high cell viability,  
531 *Biomaterials.* 35 (2014) 49–62. doi:10.1016/J.BIOMATERIALS.2013.09.078.
- 532 [46] K.Y. Lee, D.J. Mooney, Alginate: properties and biomedical applications., *Prog. Polym.*  
533 *Sci.* 37 (2012) 106–126. doi:10.1016/j.progpolymsci.2011.06.003.
- 534



535 **FIGURE LEGENDS:**

536

537

538 **Figure 1. The viability of SK-N-BE(2) cells upon encapsulation in 2% SA.** (A) Fluorescent  
539 microscopy images of live/dead assay performed on encapsulated SK-N-BE(2) cells at 24 and  
540 72h. Green (calcein) indicates live cells, red (EthD) indicates dead cells. Scale bars represent  
541 50  $\mu\text{m}$ . (B) Quantification of live/dead assay. Bars show mean % of cell viability + SD.

542

543 **Figure 2. Printed line width analysis.** (A) Fluorescent microscopy image of an example line  
544 printed using 2% SA and the FRESH method. Green signal comes from green fluorescent  
545 PLGA microspheres for visualization. (B) The same line imaged using phase-contrast  
546 microscopy. (C) Fluorescent and phase-contrast images merged together. (D) A binary  
547 representation of the line as a result of image processing using custom ImageJ script. (E)  
548 Merged image from (C) with yellow line overlaid on the top showing region of interest (ROI)  
549 based on binary line representation. ROI is finally used for line width measurement. Scale  
550 bars indicate 200  $\mu\text{m}$ .

551

552 **Figure 3. Parameter optimization index for 2% SA with and without cells.** (A) Printed line  
553 width quantification. 2% SA with SK-N-BE(2) cells and without them was printed using a set  
554 of different pressures and speeds. Bars represent mean line width quantified with custom  
555 ImageJ script + SD. Results of Tukey's multiple comparison test are presented in  
556 Supplementary Figure 1. (B) the POI for 2% SA without cells. (C) the POI for 2% SA with  
557  $1 \cdot 10^7/\text{ml}$  SK-N-BE(2) cells. Values were calculated based on equation (1) and bars represent  
558 normalized POI values from equation (2).

559

560 **Figure 4. Geometry used for FRESH bioprinting of 2% SA with SK-N-BE(2) cells.** 4-layer  
561 lattice is represented as a G-code visualization on the top panel. The bottom panel shows  
562 confocal microscopy images of 2% SA with  $1 \cdot 10^7/\text{ml}$  SK-N-BE(2) cells extruded at 12.5 psi and  
563 8 mm/s 24h after printing. Blue signal represents Hoechst nuclei staining of the cells. Scale  
564 bars represent 1 mm.

565

566 **Figure 5. SK-N-BE(2) cells viability after printing using 2% SA and FRESH.** (A) Confocal

567 microscopy images of the live/dead assay performed at 24 and 7d after printing with a  
568 different set of extrusion parameters. Green (calcein) indicates live cells, red (EthD)  
569 indicates dead cells. Scale bar represents 1 mm. (B) Quantification of live/dead assay.  
570 Bars represent mean % of cell viability + SD. (C) Quantification of object volumes from  
571 live/dead assay on SK-N-BE(2) cells after printing. Scatter plot shows separate data  
572 points representing single volumes of objects detected based on calcein cytoplasmic  
573 staining and image segmentation using Imaris software. Asterisks over plots refer to  
574 statistical significance in multiple comparison test. \*  $P \leq 0.05$ ; \*\*\*  $P \leq 0.001$ ; \*\*\*\*  $P \leq$   
575 0.0001.

576

577 **SUPPLEMENTARY FILES:**

578

579 **Supplementary Figure 1.**

580

581 Results of Tukey's multiple comparison test for average width of lines printed with 2% SA  
582 with or without SK-N-BE(2) cells. Ns  $P > 0.05$ ; \*  $P \leq 0.05$ ; \*\*  $P \leq 0.01$ ; \*\*\*  $P \leq 0.001$ ; \*\*\*\*  $P \leq$   
583 0.0001.

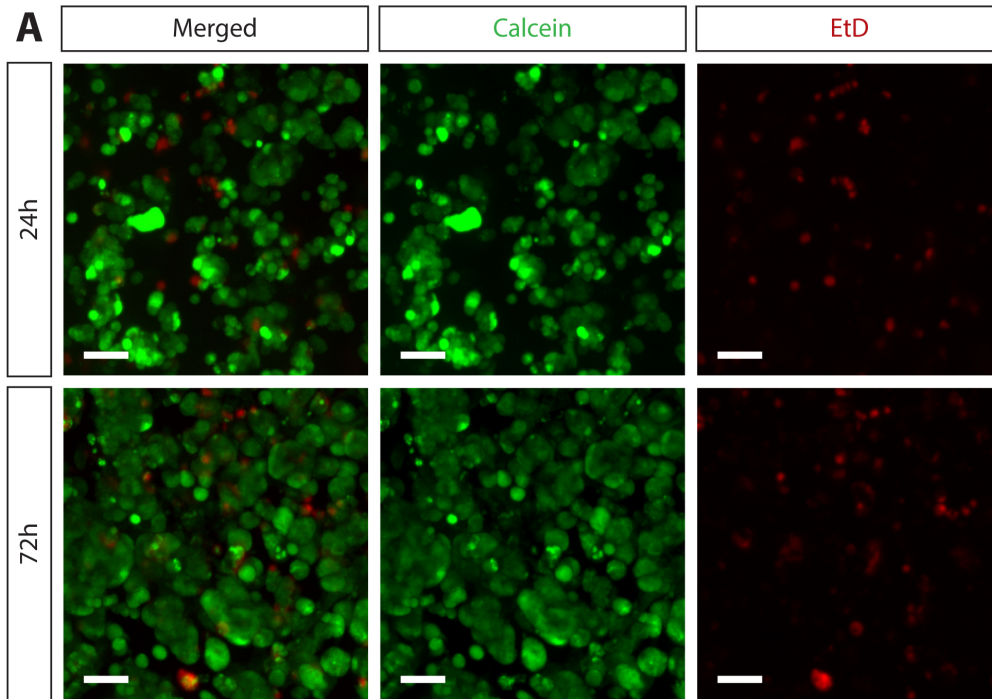

**B**

### Viability of SKN cells encapsulated in 2%SA

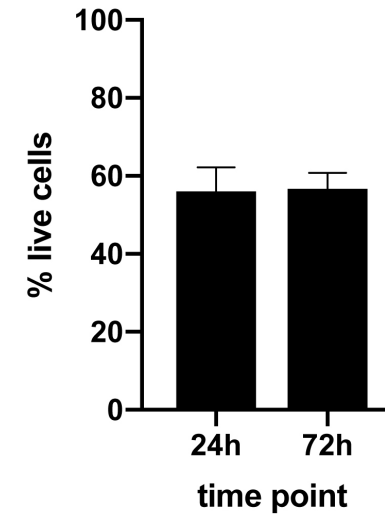

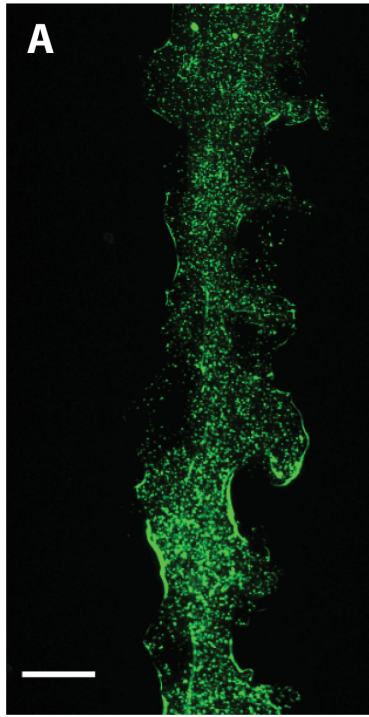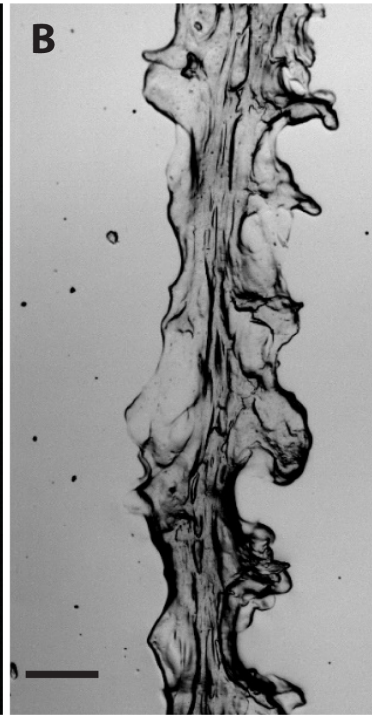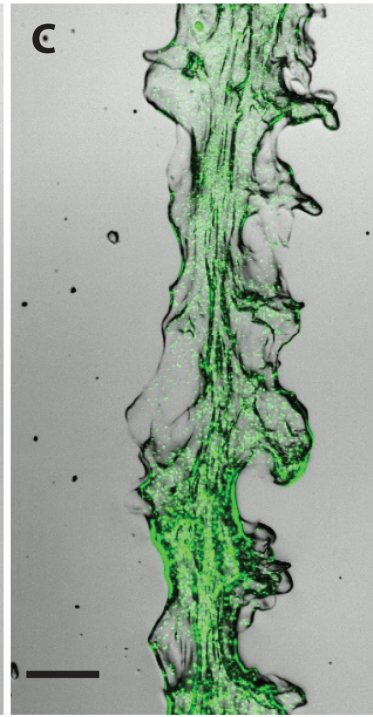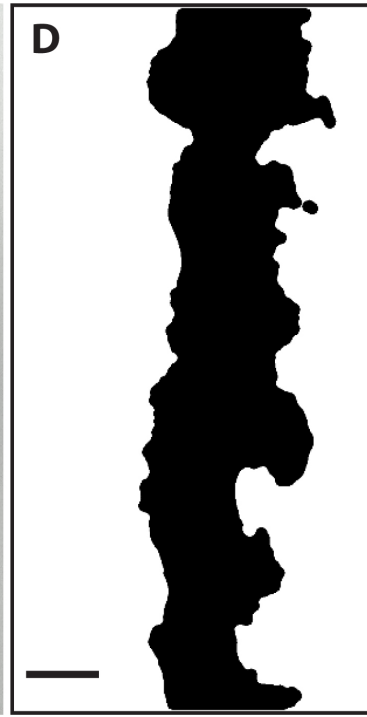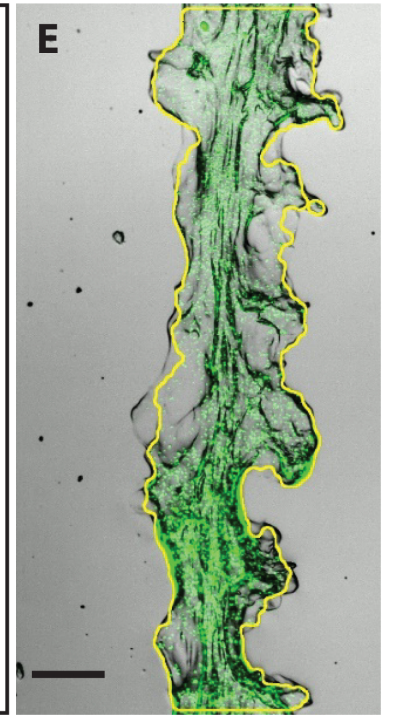

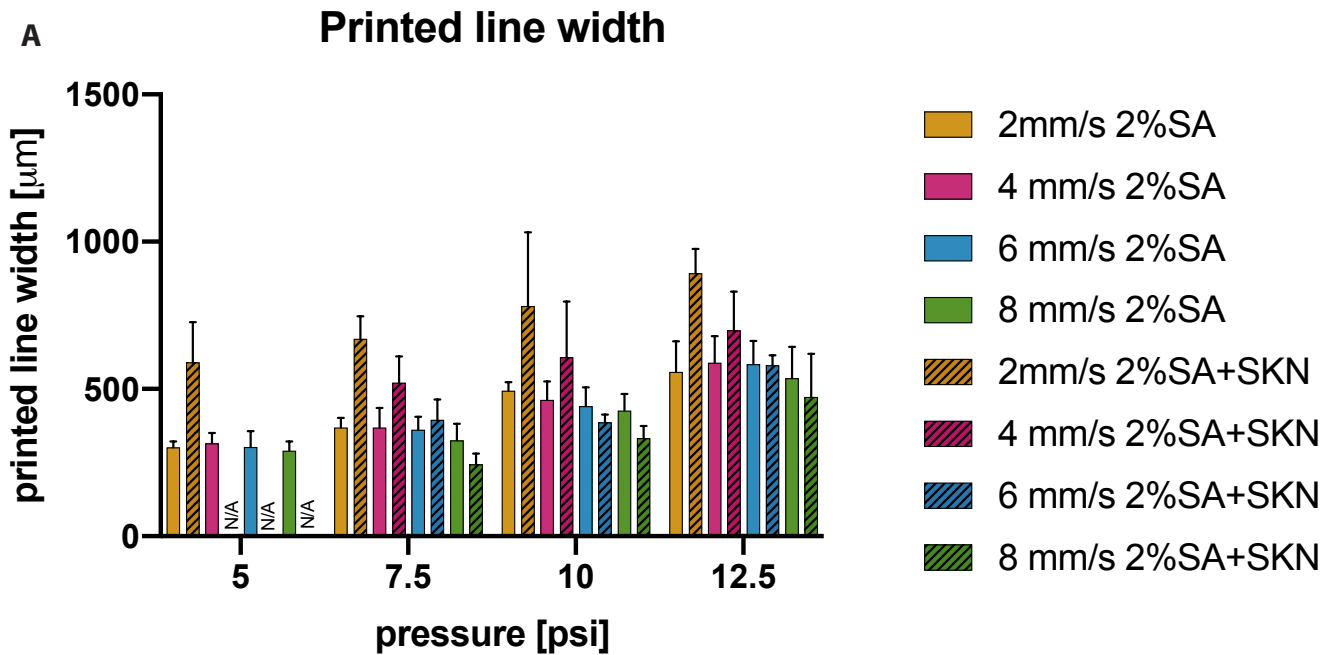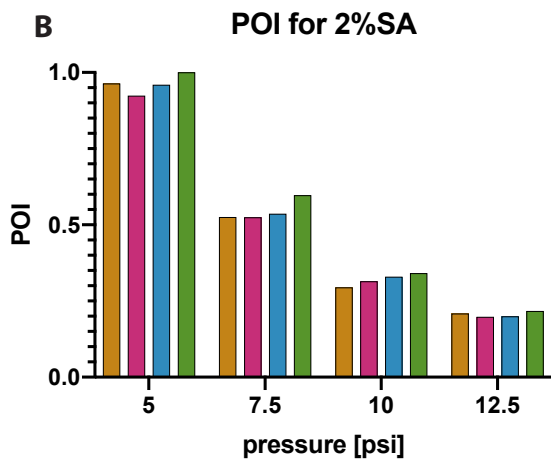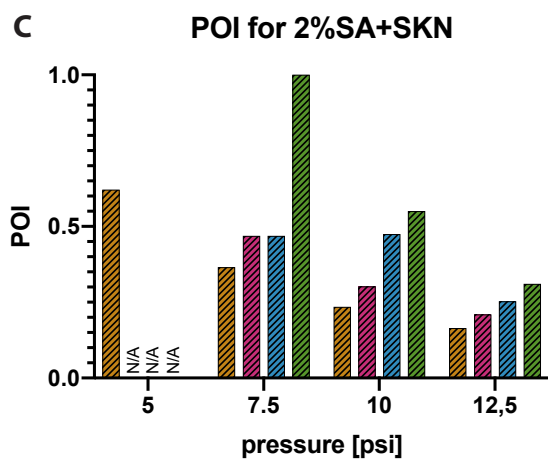

Top view

Isometric view

G-code preview

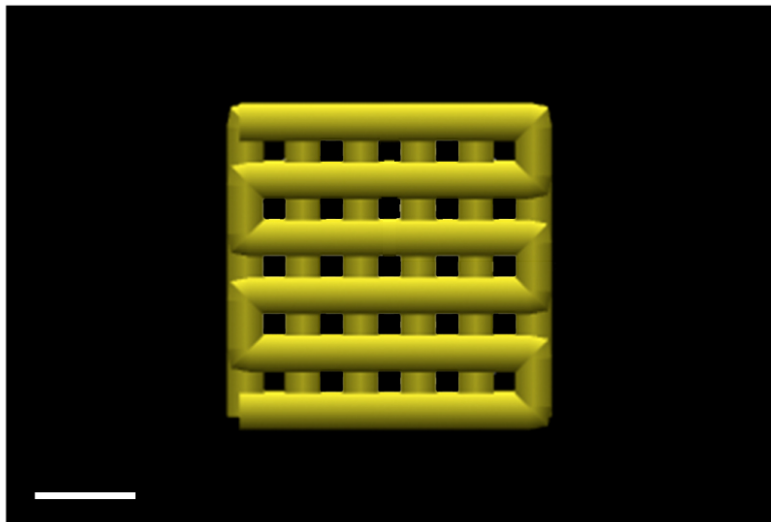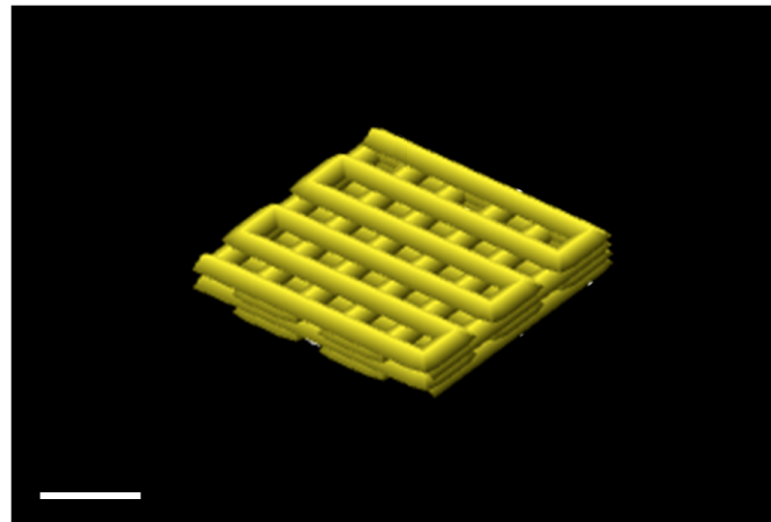

Hoechst

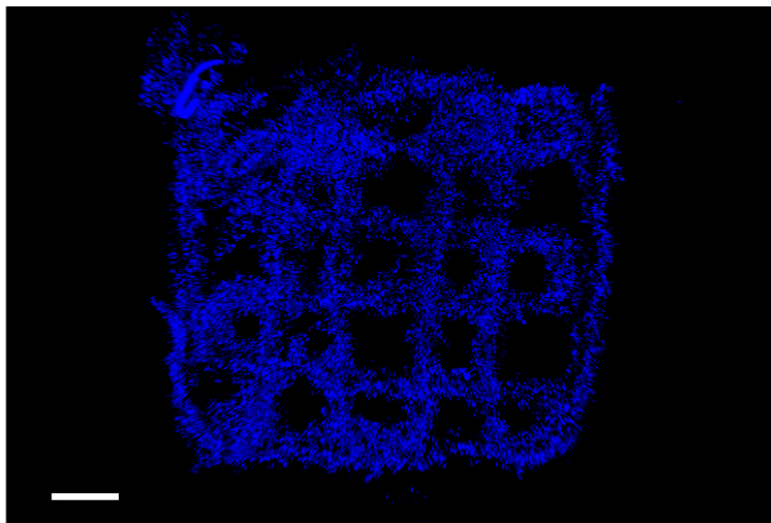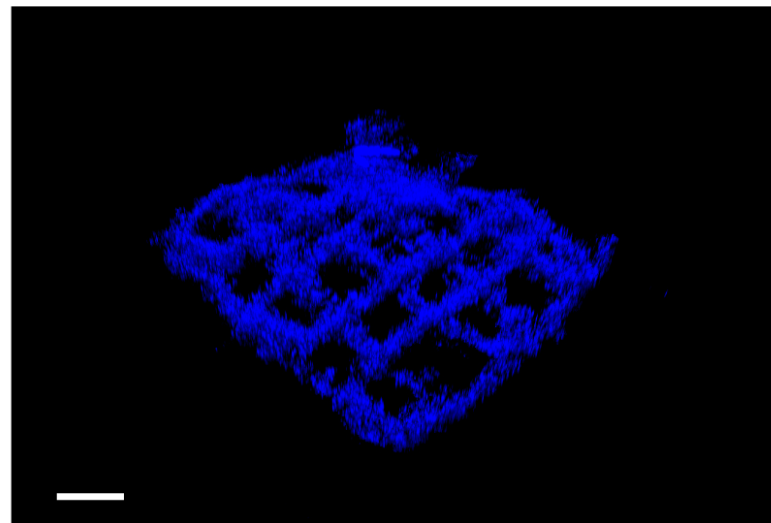



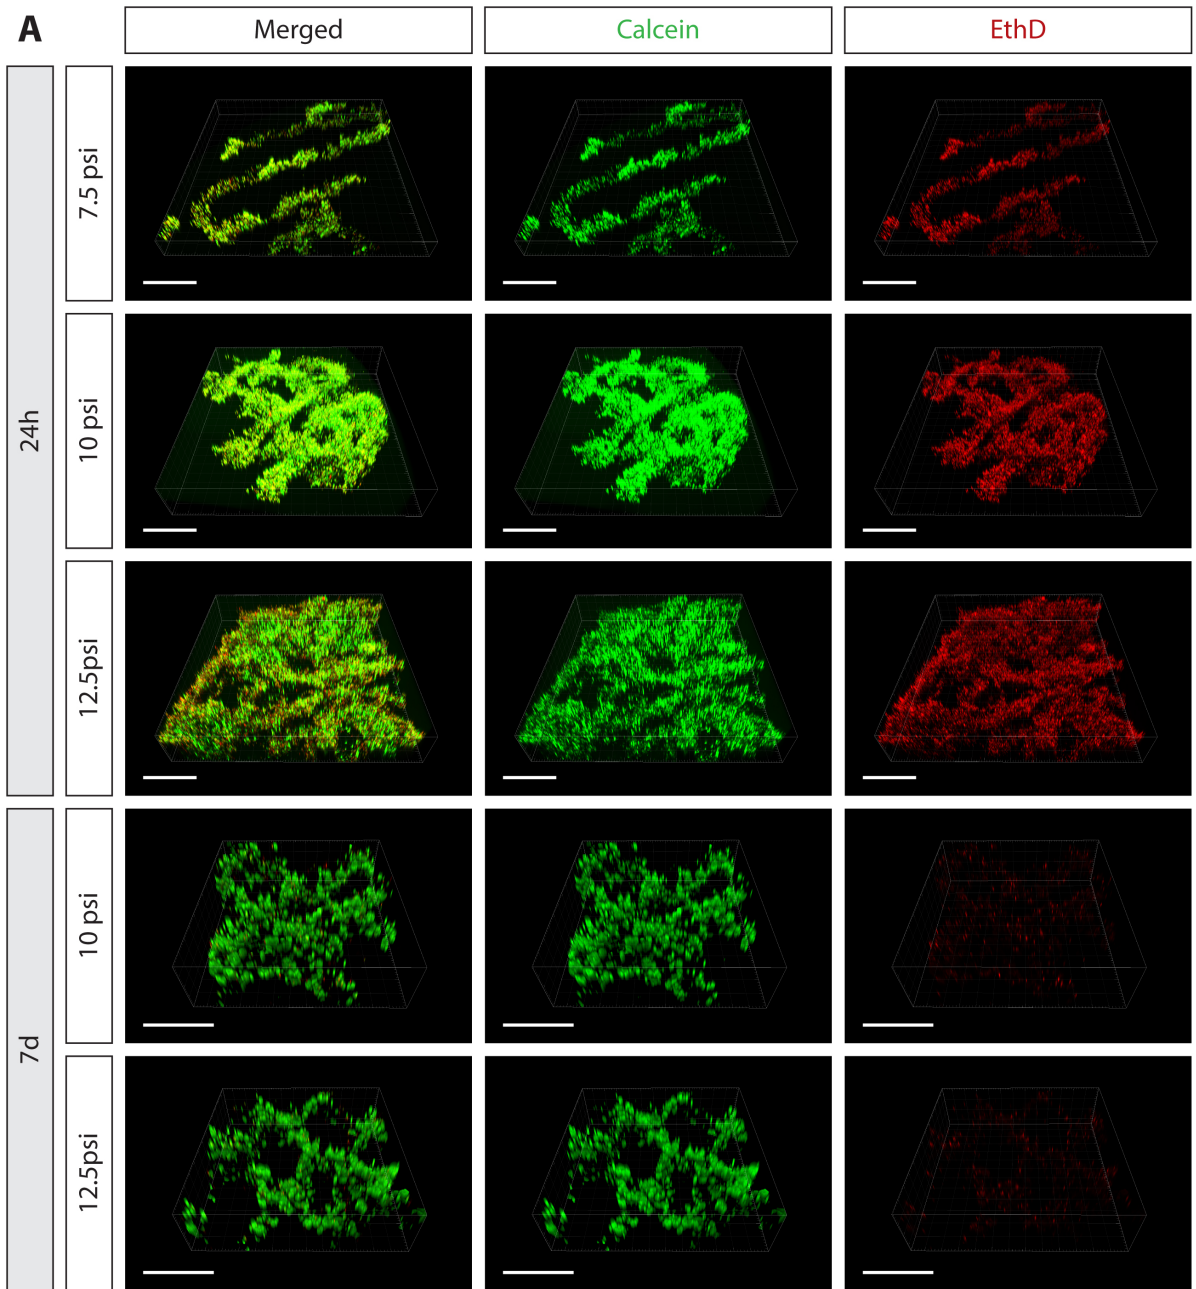

**B** Viability of SKN cells after FRESH bioprinting

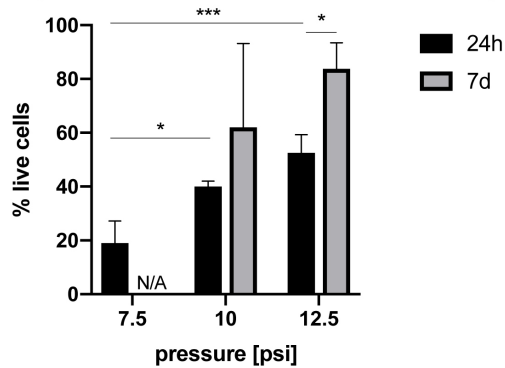

**C** Objects volume post printing

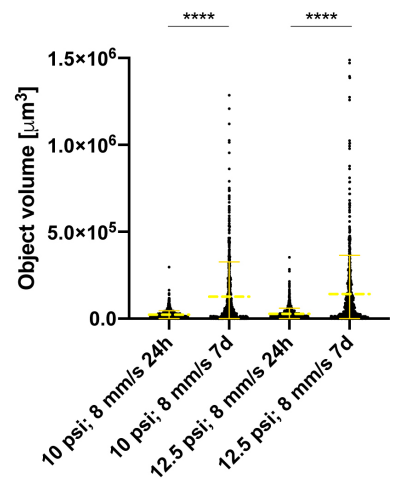

# Printed line width - Tukey's multiple comparison test

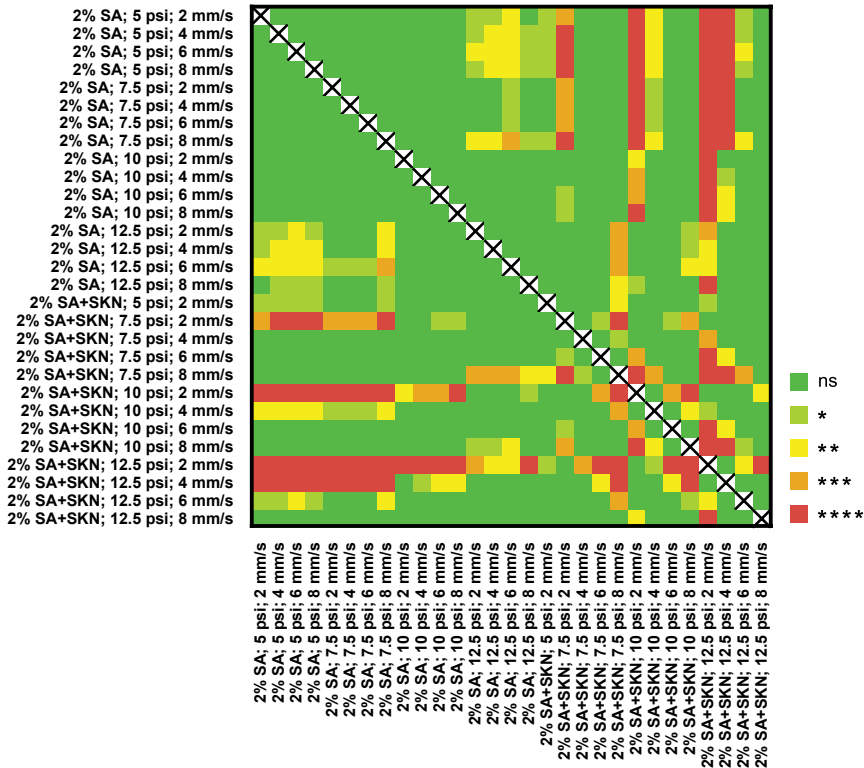

Source: http://biorxiv.org/content/10.1101/579268v1.full.pdf
